# Supplementary material for: The Significance of Angling in Stress Reduction during the COVID-19 Pandemic—Environmental and Socio-Economic Implications
Source: MDPI journal article supplement (doi:10.3390/ijerph19074346), 2022-04-05
Supplement: s1 [file s1]

**Table S1.** The full survey questionnaire.

| No.                                                                                                                                                | Question                                                                                                          | Options                                                    |           |        |   |   |
|----------------------------------------------------------------------------------------------------------------------------------------------------|-------------------------------------------------------------------------------------------------------------------|------------------------------------------------------------|-----------|--------|---|---|
| I. Sociodemographic, economic, and engagement in angling                                                                                           |                                                                                                                   |                                                            |           |        |   |   |
| 1                                                                                                                                                  | Age                                                                                                               | Type in the correct value according to your best knowledge |           |        |   |   |
| 2                                                                                                                                                  | Income (per month)                                                                                                |                                                            |           |        |   |   |
| 3                                                                                                                                                  | Domicile - place of residence (in thousands of inhabitants)                                                       |                                                            |           |        |   |   |
| 4                                                                                                                                                  | Experience - how long have you been fishing for? (in years)                                                       |                                                            |           |        |   |   |
| 5                                                                                                                                                  | Avidity - how often do you fish? (days in a year)                                                                 |                                                            |           |        |   |   |
| 6                                                                                                                                                  | Costs - how much money do you spend on your hobby (equipment expenses, licenses, travel, etc.) per year (in Euro) |                                                            |           |        |   |   |
| 7                                                                                                                                                  | Distance - what is the distance you travel to your most visited fishing spot? (in kilometers)                     |                                                            |           |        |   |   |
| 8                                                                                                                                                  | Education                                                                                                         | Primary                                                    | Secondary | Higher |   |   |
| 9                                                                                                                                                  | Tourism - is fishing the main motive of your tourist trips?                                                       | Yes                                                        | No        |        |   |   |
| 10                                                                                                                                                 | Association - are you a member of an angling organization/association?                                            | Yes                                                        | No        |        |   |   |
| 11                                                                                                                                                 | Urban site - is the fishing spot you most often visit in an urban area?                                           | Yes                                                        | No        |        |   |   |
| II. Perceptions and behaviors towards angling and life attitudes during the SARS-CoV-2 virus pandemic (how much do you agree with the statement?)* |                                                                                                                   |                                                            |           |        |   |   |
| 1                                                                                                                                                  | Fishing reduces my stress about the pandemic                                                                      | 1                                                          | 2         | 3      | 4 | 5 |
| 2                                                                                                                                                  | During the pandemic period I fished more often                                                                    | 1                                                          | 2         | 3      | 4 | 5 |
| 3                                                                                                                                                  | I am concerned about getting sick (or getting sick again) from Covid-19                                           | 1                                                          | 2         | 3      | 4 | 5 |
| 4                                                                                                                                                  | I have a positive attitude towards vaccination against Covid-19                                                   | 1                                                          | 2         | 3      | 4 | 5 |
| 5                                                                                                                                                  | My mental condition during the pandemic period has improved                                                       | 1                                                          | 2         | 3      | 4 | 5 |
| 6                                                                                                                                                  | My physical condition during the pandemic period has improved                                                     | 1                                                          | 2         | 3      | 4 | 5 |
| 7                                                                                                                                                  | I fish with my family                                                                                             | 1                                                          | 2         | 3      | 4 | 5 |
| 8                                                                                                                                                  | I have limited contact with my family during the pandemic period                                                  | 1                                                          | 2         | 3      | 4 | 5 |
| 9                                                                                                                                                  | I fish with my friends                                                                                            | 1                                                          | 2         | 3      | 4 | 5 |
| 10                                                                                                                                                 | I have limited contact with my friends during the pandemic period                                                 | 1                                                          | 2         | 3      | 4 | 5 |
| 11                                                                                                                                                 | I fish alone                                                                                                      | 1                                                          | 2         | 3      | 4 | 5 |
| 12                                                                                                                                                 | I feel exposed to Covid-19 infection at the fishing spot                                                          | 1                                                          | 2         | 3      | 4 | 5 |
| 13                                                                                                                                                 | I have limited outdoor activities during the pandemic period                                                      | 1                                                          | 2         | 3      | 4 | 5 |

\*If you do not agree with the statement, please circle "1" (Strongly disagree) or "2" (Disagree). If you agree with the statement, please circle "5" (Strongly agree) or "4" (Agree). If you do not have an opinion on a given topic or it is difficult to determine it, then please circle "3" (I have no opinion - neutral).

**Table S2.** Sociodemographic, economic, and engagement in the angling of the surveyed anglers with the number and percentage of respondents (N = 564).

| Characteristic & structure of categories  |                            | N   | %    | MoE* (%) |
|-------------------------------------------|----------------------------|-----|------|----------|
| <b>I. SOCIODEMOGRAPHIC AND ECONOMIC</b>   |                            |     |      |          |
| 1. Age (years)                            |                            |     |      |          |
| A_I                                       | Less than 25               | 81  | 14.4 | 7.7      |
| A_II                                      | 25-40                      | 240 | 42.6 | 6.3      |
| A_III                                     | 41-65                      | 207 | 36.7 | 6.6      |
| A_IV                                      | 66-85                      | 36  | 6.4  | 8.0      |
| 2. Income (monthly)                       |                            |     |      |          |
| Inc_I                                     | Less than 500€             | 129 | 22.9 | 7.3      |
| Inc_II                                    | 500-1000€                  | 291 | 51.6 | 5.7      |
| Inc_III                                   | 1000-2000€                 | 99  | 17.6 | 7.5      |
| Inc_IV                                    | More than 2000€            | 45  | 8.0  | 7.9      |
| 3. Domicile (in thousands of inhabitants) |                            |     |      |          |
| Dom_I                                     | Village                    | 138 | 24.5 | 7.2      |
| Dom_II                                    | Town to 5                  | 45  | 8.0  | 7.9      |
| Dom_III                                   | A city 5 to 50             | 171 | 30.3 | 6.9      |
| Dom_IV                                    | A city 51-100              | 54  | 9.6  | 7.9      |
| Dom_V                                     | A city over 100            | 156 | 27.7 | 7.0      |
| 4. Education (level)                      |                            |     |      |          |
| Edu_I                                     | Primary                    | 93  | 16.5 | 7.5      |
| Edu_II                                    | Secondary                  | 249 | 44.1 | 6.2      |
| Edu_III                                   | Higher                     | 222 | 39.4 | 6.4      |
| <b>II. ENGAGEMENT IN ANGLING</b>          |                            |     |      |          |
| 1. Experience (years)                     |                            |     |      |          |
| Exp_I                                     | Less than 5                | 51  | 9.0  | 7.9      |
| Exp_II                                    | 5-10                       | 96  | 17.0 | 7.5      |
| Exp_III                                   | 11-20                      | 129 | 22.9 | 7.3      |
| Exp_IV                                    | 21-30                      | 147 | 26.1 | 7.1      |
| Exp_V                                     | 31-40                      | 69  | 12.2 | 7.7      |
| Exp_VI                                    | More than 40 years         | 72  | 12.8 | 7.7      |
| 2. Avidity (frequency of angling)         |                            |     |      |          |
| Avi_I                                     | A few times a year         | 54  | 9.6  | 7.9      |
| Avi_II                                    | A dozen or so times a year | 72  | 12.8 | 7.7      |
| Avi_III                                   | About 2-3 times a month    | 126 | 22.3 | 7.3      |
| Avi_IV                                    | About once a week          | 174 | 30.9 | 6.9      |
| Avi_V                                     | A few times a week         | 138 | 24.5 | 7.2      |
| 3. Costs (per year)                       |                            |     |      |          |
| Cos_I                                     | Up to 25€                  | 36  | 6.4  | 8.0      |
| Cos_II                                    | 25-100€                    | 60  | 10.6 | 7.8      |

|                                                   |                 |     |      |     |
|---------------------------------------------------|-----------------|-----|------|-----|
| Cos_III                                           | 100-250€        | 171 | 30.3 | 6.9 |
| Cos_IV                                            | 251-500€        | 150 | 26.6 | 7.1 |
| Cos_V                                             | 500-1000€       | 72  | 12.8 | 7.7 |
| Cos_VI                                            | More than 1000€ | 75  | 13.3 | 7.7 |
| 4. Distance (to most often fished spot in km)     |                 |     |      |     |
| Dis_I                                             | Less than 5     | 153 | 27.1 | 7.0 |
| Dis_II                                            | 6-10            | 102 | 18.1 | 7.5 |
| Dis_III                                           | 11-30           | 171 | 30.3 | 6.9 |
| Dis_IV                                            | 31-50           | 69  | 12.2 | 7.7 |
| Dis_V                                             | 51-70           | 36  | 6.4  | 8.0 |
| Dis_VI                                            | More than 70    | 33  | 5.9  | 8.0 |
| 5. Fishing is the main tourism motive             |                 |     |      |     |
| TOUR_Y                                            | Yes             | 270 | 47.9 | 6.0 |
| TOUR_N                                            | No              | 294 | 52.1 | 5.7 |
| 6. Affiliation in angling association             |                 |     |      |     |
| AFF_Y                                             | Yes             | 459 | 81.4 | 3.6 |
| AFF_N                                             | No              | 105 | 18.6 | 7.4 |
| 7. Most visited angling spot is in the urban area |                 |     |      |     |
| URB_Y                                             | Yes             | 147 | 26.1 | 7.1 |
| URB_N                                             | No              | 417 | 73.9 | 4.2 |

\* Margin of sampling error (%) at 95% confidence interval
